1 Ecological Network Metrics: Opportunities for  
2 Synthesis

3 Matthew K. Lau<sup>1†</sup>, Stuart R. Borrett<sup>2,3</sup>, Benjamin Baiser<sup>4</sup>,  
4 Nicholas J. Gotelli<sup>5</sup>, Aaron M. Ellison<sup>1</sup>

4 1 Harvard Forest, Harvard University, Petersham, MA 02138

5 2 Department of Biology and Marine Biology, University of North Carolina,  
6 Wilmington NC 28403

7 3 Duke Network Analysis Center, Social Science Research Institute, Duke Uni-  
8 versity, NC 27708

9 4 Department of Wildlife Ecology and Conservation, University of Florida, Gainesville,  
10 FL 32611

11 5 Department of Biology, University of Vermont, Burlington, VT 05405

12 † Corresponding author: Matthew K. Lau ([matthewklau@fas.harvard.edu](mailto:matthewklau@fas.harvard.edu))

13

## Abstract

14

15

16

17

18

19

20

21

22

23

24

25

26

27

28

29

Network ecology provides a systems basis for approaching ecological questions, such as factors that influence biological diversity, the role of particular species or particular traits in structuring ecosystems, and long-term ecological dynamics (e.g., stability). Whereas the introduction of network theory has enabled ecologists to quantify not only the degree, but also the architecture of ecological complexity, these advances have come at the cost of introducing new challenges, including new theoretical concepts and metrics, and increased data complexity and computational intensity. Synthesizing recent developments in the network ecology literature, we point to several potential solutions to these issues: integrating network metrics and their terminology across sub-disciplines; benchmarking new network algorithms and models to increase mechanistic understanding; and improving tools for sharing ecological network research, in particular “model” data provenance, to increase the reproducibility of network models and analyses. We propose that applying these solutions will aid in synthesizing ecological subdisciplines and allied fields by improving the accessibility of network methods and models.

30

31

*Keywords:* benchmarking; computation; data provenance; metrics; network ecology; systems analysis

## 32 Introduction

33 Interactions are at the heart of ecology and drive many of its key questions. What are  
34 the roles of species interactions in ecological systems? When and why is biological  
35 diversity important? What factors influence the long-term dynamics of ecosystems?  
36 These are all questions with a long history in ecology (Cherrett 1989; Council 2003;  
37 Lubchenco et al. 1991; Sutherland et al. 2013) that are not addressed in isolation.  
38 Points of intersection include the relationship between diversity and stability (May  
39 2001, 2006); the identity and role of species that are the main drivers of commu-  
40 nity structure (e.g., keystone species, Paine 1966), ecosystem engineers (Jones et al.  
41 1994), or foundation species (Dayton 1972; Ellison et al. 2005); and the causes and  
42 consequences of introducing new species into existing assemblages (Baiser et al. 2008;  
43 Simberloff and Holle 1999). Furthermore, “systems thinking” has been a persistent  
44 thread throughout the history of ecology (Margalef 1963; Odum and Pinkerton 1955;  
45 Patten 1978; Patten and Auble 1981; Ulanowicz 1986), dating back at least to Dar-  
46 win’s *Origin of Species* in his famous pondering of an entangled bank (Bascompte  
47 and Jordano 2014; Golley 1993). The application of network theory has provided  
48 a formal, mathematical framework to approach systems (Bascompte and Jordano  
49 2014; Proulx et al. 2005) and led to the development of network ecology (Borrett  
50 et al. 2014; Patten and Witkamp 1967; Poisot et al. 2016b).

51 Network ecology can be defined as the use of network models and analyses to in-  
52 vestigate the structure, function, and evolution of ecological systems at many scales  
53 and levels of organization (Borrett et al. 2012; Eklöf et al. 2012). The influx of  
54 network thinking throughout ecology, and ecology’s contribution to the development  
55 of network science highlights the assertion that “networks are everywhere” (Lima  
56 2011). And, as one would expect, the field has grown rapidly, from 1% of the pri-  
57 mary ecological literature in 1991 to over 6% in 2017 (Fig. 1A). Some examples  
58 include: applying network theory to population dynamics and spread of infectious  
59 diseases (May 2006); description and analysis of networks of proteins in adult or-  
60 ganisms (Stumpf et al. 2007) or during development (Hollenberg 2007); expanding  
61 classical food webs to include parasites and non-trophic interactions (Ings et al. 2009;  
62 Kéfi et al. 2012); investigating animal movement patterns (Lédée et al. 2016) and  
63 the spatial structure of metapopulations (Dubois et al. 2016; Holstein et al. 2014);  
64 connecting biodiversity to ecosystem functioning (Creamer et al. 2016); identifying  
65 keystone species (Borrett 2013; Zhao et al. 2016); and using social network theory in  
66 studies of animal behavior (Croft et al. 2004; Fletcher et al. 2013; Krause et al. 2003;  
67 Sih et al. 2009). Further, ideas and concepts from network ecology are being applied  
68 to investigate the sustainability of urban and industrial systems (Fang et al. 2014;

69 Layton et al. 2016; Xia et al. 2016) and elements of the food-energy-water nexus  
70 (Wang and Chen 2016; Yang and Chen 2016).

71 Over the past 15 years, re-occurring themes for moving network ecology forward  
72 have emerged from reviews, perspectives, and syntheses (e.g., Bascompte 2010; Bor-  
73 rett et al. 2014; Poisot et al. 2015; Proulx et al. 2005). In this paper, we examine areas  
74 where the network approach is being applied to address important ecological ques-  
75 tions and identify both challenges and opportunities for advancing the field. Among  
76 these are the need for shifting the focus toward mechanisms rather than observa-  
77 tions, and increasing the resolution (e.g., individuals or traits as nodes and weighted  
78 edges of different interaction types) and replication of network models across dif-  
79 ferent ecosystems and time (Ings et al. 2009; Poisot et al. 2016*b*; Woodward et al.  
80 2010). After a brief primer of key concepts from network ecology, we discuss the  
81 following topics as they relate to these issues: the proliferation of terminology for  
82 ecological metrics with the increasing application of network methods; fully exploring  
83 the underlying assumptions of models of mechanistic processes for generating net-  
84 work structure; and the need for improved sharing and reproducibility of ecological  
85 network research and models. Although these topics are not new, the combination of  
86 the influx of metrics and theory and rapid increases in the computational intensity of  
87 ecology are creating novel challenges. With respect to these issues, we discuss recent  
88 advances that should be explored as tools to aid in a more effective integration of  
89 network methods for synthesis across ecological sub-disciplines.

## 90 **A primer of ecological networks: models and met-** 91 **rics**

92 Prior to the introduction of network methods in ecology, the primary way of study-  
93 ing interactions was limited to detailed studies of behaviors and traits of individual  
94 species important to interactions, or of relationships between tightly interacting pairs  
95 of species (Carmel et al. 2013). Some ecologists were advancing whole-system meth-  
96 ods (Lindeman 1942; Odum 1957); however, quantifying interactions is costly, as  
97 compared to surveys of species abundances. This has created a significant barrier to  
98 studying interactions at the scale of entire communities, either at the scale of indi-  
99 viduals or species pairs, because the number of interactions becomes intractable. For  
100 instance, even if one assumes that only pairwise interactions occur among  $S$  species,  
101 the number of possible pairs is  $S(S-1)/2$ . Local assemblages of macrobes often have  
102  $10^1 - 10^2$  species, and microbial diversity can easily exceed  $10^3$  OTUs (Operational  
103 Taxonomic Units).

104 This complexity of ecological systems is one reason there is a long tradition in  
105 community ecology of studying interactions within small subsets of closely-related  
106 species (e.g. trophic guilds) and using dimensionality reducing methods based on  
107 multivariate, correlative approaches (Legendre et al. 2012). While some approaches  
108 to studying subsets of species incorporate the underlying pattern of direct and in-  
109 direct links (e. g., modules, (*sensu* Holt 1997; Holt and Hoopes 2005), the ma-  
110 jority do not. Such limitations repeatedly have led to calls for the application of  
111 “network thinking” to ecological questions (e.g., Golubski et al. 2016; Ings et al.  
112 2009; Jacoby and Freeman 2016; Patten and Witkamp 1967; Proulx et al. 2005;  
113 QUINTESSENCE Consortium et al. 2016; Urban and Keitt 2001). There are now  
114 many resources for learning about network ecology and network theory in general,  
115 and we point the reader in the direction of excellent reviews in this area (Bascompte  
116 and Jordano 2007; Borrett et al. 2012; Brandes et al. 2013; Ings et al. 2009; Proulx  
117 et al. 2005) and more comprehensive introductions (Brandes and Erlebach 2005;  
118 Estrada 2015; Newman 2010).

119 Network ecology employs network theory to quantify the structure of ecological  
120 interactions. All networks consist of sets of interacting nodes (e.g. species, non-  
121 living nutrient pools, habitat patches) whose relationships are represented by edges  
122 (e.g. nutrient or energy transfers, pollination, movement of individuals). Conceptu-  
123 ally, a network is a set of things or objects with connections among them. Stated  
124 mathematically, a network is a generic relational-model comprised of a set of objects  
125 represented by nodes or vertices ( $N$ ) and a set of edges ( $E$ ) that map one or more  
126 relationships among the nodes,  $G = (N, E)$ . A canonical ecological example of a net-  
127 work is a food-web diagram, in which the nodes represent species, groups of species,  
128 or non-living resources, and the *edges* map the relationship who-*eats*-whom.

129 The analysis of networks is inherently hierarchical, ranging from the entire net-  
130 work down to individual nodes and edges. Depending on the characteristics and level  
131 of detail of the information provided for a given model, there is a large number of  
132 network analyses and metrics that can be used to characterize the system at multiple  
133 levels (similar to Hines and Borrett, 2014; Wasserman and Faust, 1994), including:  
134 (1) the whole network level (i.e., the entire network), (2) the sub-network level (i.e.,  
135 groups of two or more nodes and their edges), and (3) the individual node or edge  
136 level (Fig. 2).

137 Network-level metrics integrate information over the entire set of nodes and edges.  
138 For example, the number of nodes (e.g., the species richness of a food web) and  
139 the density of connections or connectance are both network-level statistics used to  
140 describes the overall complexity of a network and have been investigated by ecologists  
141 for over 40 years (Allesina and Tang 2012; May 1972).

142 Sub-network level analyses focus on identifying specific subsets of nodes and  
143 edges. There are a variety of groups that have different names (e.g., module, motif,  
144 cluster, clique, environ) and different methods for measurement. Sub-networks often  
145 represent more tractable and meaningful units of study than individual nodes and  
146 edges on the one hand or entire networks on the other. For example, in landscape  
147 and population ecology, the preferential movement of individuals and genes (edges)  
148 between habitat patches (nodes) has implications for conservation of populations and  
149 the design of preserves (Calabrese and Fagan 2004; Fletcher et al. 2013; Holt and  
150 Hoopes 2005). Also, both nodes and edges can be divided into classes. An example  
151 of this is the bipartite graph, in which interactions occur primarily between, rather  
152 than within, each class or “part” of the community. A bipartite network has only two  
153 classes of nodes, such as in a pollination network in which the community is divided  
154 into plants being pollinated and insects that do the pollination (Petanidou et al.  
155 2008). In this network, edges representing pollination visits can only map between  
156 two nodes in the different classes.

157 Metrics at the individual node or edge level quantify differences in relative impor-  
158 tance. Whether we are interested in an individual or species that transmits disease,  
159 species whose removal will result in secondary extinctions, or key habitat patches  
160 that connect fragmented landscapes, identifying important nodes is a critical com-  
161 ponent of network analysis. Another type of node or edge-level metric classifies  
162 nodes or edges according to their roles within a network. This classification can use  
163 information from differing levels. Additionally, nodes and edges can have variable  
164 characteristics. Edges can be weighted and they can map a directed relationship  
165 (as opposed to a symmetric or undirected relationship). For example, in ecosystem  
166 networks, the edges show the directed movement of energy or nutrients from one  
167 node to another by some process like feeding, and the edge weight can indicate the  
168 amount of energy or mass in the transaction (Baird and Ulanowicz 1989; Dame and  
169 Patten 1981). Nodes also can be weighted (e.g., size of individual, population size,  
170 biomass of a given species). Lastly, network models are flexible enough to accommo-  
171 date variation in edge types and relationships among edges (e.g., hypergraphs), but  
172 analysis of these more complicated models is challenging and has only begun to be  
173 applied in ecology (e.g., Golubski et al. 2016).

## 174 **Resolving network metrics**

175 The application of network theory defines an explicit mathematical formalism that  
176 provides a potentially unifying set of terms for ecology and its inter-disciplinary  
177 applications (QUINTESSANCE Consortium et al. 2016). Ironically, the development

178 of ecological network metrics has had an opposing affect. One reason for this is  
179 that introductions have occurred in multiple sub-disciplinary branches (Fig. 1B)  
180 (Blüthgen 2010; Borrett et al. 2014; Carmel et al. 2013). Having separate research  
181 trajectories can facilitate rapid development of ideas and the process of integration  
182 can lead to novel insights (Hodges 2008). At the same time, these innovations in  
183 network ecology have come at the cost of the “rediscovery” of the same network  
184 metrics and subsequent description of them with new terms. This has led to different  
185 metrics with similar purposes existing in separate areas of ecology (Table 1).

186 Ecological studies using network approaches draw from a deep well of general net-  
187 work theory (Newman 2003, 2006; Strogatz 2001). Ecologists broadly use network  
188 concepts, techniques, and tools to: (1) characterize the system organization (Borrett  
189 2013; Croft et al. 2004; Ulanowicz 1986); (2) investigate the consequences of the  
190 network organization (Borrett et al. 2006; Dunne et al. 2002; Grilli et al. 2016); and  
191 (3) identify the processes or mechanisms that might generate the observed patterns  
192 (Allesina and Pascual 2008; Fath et al. 2007; Guimarães et al. 2007; Poisot et al.  
193 2016*b*; Ulanowicz et al. 2014; Williams and Martinez 2000). The unnecessary pro-  
194 liferation of network metrics is exemplified by “connectance” ( $C$ ), which is used by  
195 food-web ecologists to mean the ratio of the number of edges in the network divided  
196 by the total number of possible edges. Elsewhere in the network science literature,  
197 this measurement is referred to as network density (Newman et al. 2001). As an-  
198 other example, what ecosystem ecologists have described as “average path length”  
199 (total system through-flow divided by the total system input) (Finn 1976) also has  
200 been called network aggradation (Jørgensen et al. 2000). In economics, average path  
201 length is known as the multiplier effect (Samuelson 1948).

202 Another kind of redundancy is the creation and use of multiple statistics that  
203 measure the same or very similar network aspects. A clear example of this is inher-  
204 ent in the proliferation of centrality measures to indicate node or edge importance.  
205 Network scientists have shown that many centrality metrics are correlated (Jordán  
206 et al. 2007; Newman 2006; Valente et al. 2008). Likewise, Borrett and Osidele (2007)  
207 found that nine commonly reported ecosystem network analysis metrics covaried  
208 in 90 plausible parameterizations of a model of phosphorus biogeochemical cycling  
209 for Lake Lanier, GA, but that all these metrics were associated strongly with only  
210 two underlying factors. However, even a perfect correlation does not mean that  
211 two metrics have identical properties, and they still may diverge in different models.  
212 Therefore, it is important to have mathematically based comparisons of metrics (Bor-  
213 gatti and Everett 2006; Borrett 2013; Kazanci and Ma 2015; Ludovisi and Scharler  
214 2017). It is incumbent on network ecologists to establish clearly the independence  
215 and uniqueness of the descriptive metrics used.

216 From the perspective of the broader field of ecology, the proliferation of con-  
217 cepts, terms, and metrics is not a new issue (e.g., Ellison et al. 2005; Tansley 1935).  
218 Ecologists have a long history of using network concepts and related models in mul-  
219 tiple subdomains (e.g., metapopulations, matrix population models, community co-  
220 occurrence models, ecosystems) without fully recognizing or capitalizing on the sim-  
221 ilarities of the underlying models. Each subdomain has constructed its own concepts  
222 and methods (occasionally borrowing from other areas), and established its own jar-  
223 gon that impedes scientific development. Previous suggestions for solving this issue  
224 have focused on maintaining an historical perspective of ecology (Graham and Day-  
225 ton 2002); Blüthgen et al. (2008) is an excellent example of how this can be done  
226 through peer-reviewed literature.

227 One possible approach that would go beyond such a diffuse, literature-centered  
228 approach would be to develop a formal ontology of concepts and metrics. An on-  
229 tology is a a set of related terms that are formally defined and supported by as-  
230 sertions (Bard and Rhee 2004). An ontology therefore provides a framework for  
231 developing concepts within a discipline and presents the opportunity for more ef-  
232 ficient synthesis across disciplinary boundaries. The concept of an ontology is not  
233 new, but more rapid sharing of ontologies and their collaborative development have  
234 been enabled by the Internet. For example, the Open Biological Ontologies (OBO,  
235 <http://www.obofoundry.org>) supports the creation and sharing of ontologies over  
236 the web. Currently, there is no OBO for a “network ecology metric” ontology, and  
237 as far as we are aware, ontologies have yet to be explored or developed for network  
238 metrics.

239 The OBO could provide a platform for harmonizing ecological network metrics,  
240 terms, and concepts. Key obstacles to such harmonization include a requirement that  
241 network ecologists work within a common framework, and the need for an individual  
242 or leadership team to periodically curate the ontology based on new developments in  
243 the field. In determining the best course of action, network ecologists could follow the  
244 example of how similar OBO projects have been managed in the past. The *FOODON*  
245 food role ontology project (<http://www.obofoundry.org/ontology/foodon.html>)  
246 contains information about “materials in natural ecosystems and food webs as well  
247 as human-centric categorization and handling of food.” It could serve as an example  
248 or even the basis of a ecological network metric ontology.

## 249 **Benchmarking: Trusting our models of mechanisms**

250 Inferences about processes in ecological systems have relied in part on the application  
251 of simulation models that generate matrices with predictable properties. As discussed



252 in the previous section, the proliferation of network metrics points to the need for  
253 the investigation and comparison of how these metrics will behave in the context  
254 of different modeling algorithms. Once a metric or algorithm has been chosen, it  
255 is tempting apply them widely to empirical systems to detect patterns, but before  
256 research proceeds, a process of “benchmarking” with artificial matrices that have  
257 predefined amounts of structure and randomness should be used to examine the  
258 behavior of the algorithms and the metrics that are applied to them.

259 Benchmarking of ecological models developed from null model analysis in com-  
260 munity ecology (Atmar and Patterson 1993; Connor and Simberloff 1979; Gotelli and  
261 Ulrich 2012). Null models are specific examples of randomization or Monte Carlo  
262 tests (Manly 2007) that estimate a frequentist  $P$  value, the tail probability of ob-  
263 taining the value of some metric if the null hypothesis were true (Gotelli and Graves  
264 1996). The aim of a null model is to determine if the structure of an observed eco-  
265 logical pattern in space or time is incongruous with what would be expected given  
266 the absence of a causal mechanism. A metric of structure calculated for a single  
267 empirical data set is compared to the distribution of the same metric calculated for  
268 a collection of a large number of randomizations of the empirical data set. The data  
269 are typically randomized by reshuffling some elements while holding other elements  
270 constant to incorporate realistic constraints. Comparison with a suite of null models  
271 in which different constraints are systematically imposed or relaxed may provide a  
272 better understanding of the factors that contribute most to patterns in the network  
273 (see Box 1). However, the devil remains in the details and there are also a variety  
274 of ways to randomize data and impose constraints to construct a useful null model.  
275 If the null model is too simplistic, such as a model in which edges and nodes are  
276 sampled with uniform probability, it will always be rejected and provide little insight  
277 into important ecological patterns, regardless of what metric is used. At the other  
278 extreme, if the null model incorporates too many constraints from the data, it will  
279 be difficult or impossible to reject the null hypothesis, even though the network may  
280 contain interesting structure.

281 In network theory, the Erdos-Renyi (ER, (Erdős and Rényi 1959)) model is a  
282 now-classic example of a model used to generate networks via a random process  
283 for creating matrix structure. The ER model is a random graph that starts with an  
284  $N \times N$  adjacency matrix of nodes and assigns to it  $K$  edges between randomly chosen  
285 pairs of nodes. The ER model has been applied in ecology to address questions about  
286 the relationship between stability and complexity (May 1972) and the structure of  
287 genetic networks (Kauffman et al. 2003). For example, randomized networks have  
288 been used to link motifs (Milo et al. 2002) to network assembly (Baiser et al. 2016),  
289 stability (Allesina and Pascual 2008; Borrelli et al. 2015), and persistence in food

290 webs (Stouffer and Bascompte 2010).

291 In addition to the random matrix approaches of null and ER models, there are  
292 other, more complex algorithms that are used to generate structured matrices. Per-  
293 haps one of the best known in network theory is the Barabasi-Albert (BA, Barabási  
294 and Albert 1999) model, which adds nodes and edges to a growing network with  
295 a greater probability of adding edges to nodes with a higher degree. The BA algo-  
296 rithm is similar to ecological network algorithms that generate non-random structure,  
297 because of either direct influence or similar processes operating in systems of inter-  
298 est. Some of these models include processes of “preferential attachment” in which  
299 organisms tend to interact with the same, common species. Food-web modeling algo-  
300 rithms also have been developed that use a trait-based approach (e.g., Allesina and  
301 Pascual 2009), consumer-resource models (Yodzis and Innes 1992), niches (Williams  
302 and Martinez 2000), cyber-ecosystem algorithms (Fath 2004), and cascade models  
303 (Allesina and Pascual 2009; Allesina and Tang 2012; Cohen and Luczak 1992).

304 The statistical behavior of some models and metrics can be understood ana-  
305 lytically. For example, the networks generated by the BA algorithm display degree  
306 distributions that approximate a power-law distribution, like many real-world “scale-  
307 free” networks (Albert et al. 2002). If the network is sparse (i.e.,  $(K \ll N^2)$ ), the  
308 degree distribution of the network should follow a Poisson distribution. However, as  
309 new models and metrics are introduced, new benchmarking should be done and com-  
310 pared to previous results. Newman et al. (2016) is one example of how benchmarking  
311 can be used for investigating processes operating on ecological networks. Ludovisi  
312 and Scharler (2017) advocate the same approach for the analysis of network models  
313 in general. The `benchmark` (Eugster and Leisch 2008) package in R (R Core Team  
314 2017) is a general algorithm-testing software package that provides a useful starting  
315 point.

## 316 **Reproducibility: Open-data, Open-source and Prove-** 317 **nance**

318 As analyses of network models increase in computational intensity, there is a concomi-  
319 tant increase in the need for new tools to track and share key computational details.  
320 This need is compounded when models incorporate data from multiple sources or  
321 analyses involve random processes. The combination of the volume of data and com-  
322 putational intensity of studies of ecological networks further increases the burden on  
323 ecologists to provide information needed to adequately reproduce datasets, analyses,  
324 and results. As the sharing and reproducibility of scientific studies are both essential

325 for advances to have lasting impact, finding easier, faster, and generally more conve-  
326 nient ways to record and report relevant information for ecological network studies  
327 is imperative for advancing the field.

328 Sharing data and open-source code have become established in ecology, and net-  
329 work ecologists are now producing more network models and data (e.g., Fig. 1A).  
330 These include not only ecological interaction networks, but also an influx of other rele-  
331 vant networks, including ecological genomic networks generated by next-generation,  
332 high-throughput sequencing technologies (Langfelder and Horvath 2008; Zinkgraf  
333 et al. 2017). There are now multiple web-accessible scientific databases (e.g., NCBI,  
334 Data Dryad, Dataverse) and at least four databases have been constructed specifically  
335 to curate ecological network data: including “Kelpforest” (Beas-Luna et al. 2014),  
336 “The Web of Life” (Fortuna et al. 2014), “Mangal” ecological network database  
337 (Poisot et al. 2015) and the “Interaction Web Database” ([https://www.nceas.  
338 ucsb.edu/interactionweb/resources.html](https://www.nceas.ucsb.edu/interactionweb/resources.html)).

339 The increase in ecological network data is linked to an increasing rate of shared  
340 analytical code and other open-source software. It is now commonplace for ecologists  
341 to have a working knowledge of one or more programming languages, such as R,  
342 Python, SAS, MatLab, Mathematica, or SPSS. Multiple software packages exist for  
343 doing ecological analyses, including ecological network analyses. In addition to the  
344 general network analysis packages available in R, there are at least two packages  
345 aimed specifically at ecological network analysis: `bipartite` and `enR`. The former  
346 provides functions drawn largely from community ecology (Dormann et al. 2009),  
347 whereas the latter provides a suite of algorithms developed in the ecosystem network  
348 analysis literature (Borrett and Lau 2014; Lau et al. 2015).

349 Although, ecology has long had a culture of keeping records of important re-  
350 search details, such as field and lab notebooks, these practices put all of the burden  
351 of recording “metadata” on the researcher. Manual record-keeping methods, even  
352 when conforming to metadata standards (e.g., EML, see Boose et al. 2007), do not  
353 take advantage of the power of the computational environment. Data-provenance  
354 methods aim to provide a means to collect formalized information about computa-  
355 tional processes, ideally in a way that aids the reproducibility of studies with minimal  
356 impact on the day-to-day activities of researchers (Boose et al. 2007). These tech-  
357 niques have been applied in other areas of research and could provide an effective  
358 means for documenting the source and processing of data from the raw state into a  
359 model (Boose and Lerner 2017).

360 The reproducibility of scientific studies is imperative for advances to have lasting  
361 impact through the independent verification of results. Although this has been an  
362 ongoing topic of discussion in ecology (Ellison 2010; Parker et al. 2016), the need was

363 highlighted by a recent survey finding issues with reproduction of studies across many  
364 scientific disciplines (Baker 2016). There is significant motivation from within the  
365 ecological community to move toward providing detailed information about computa-  
366 tional workflows for both repeatability and reproducibility, which includes repetition  
367 by the original investigator (Lowndes et al. 2017). It is also important in network  
368 ecology for data sources and methods for model construction be standardized and  
369 transparent, and that models be curated and shared (McNutt et al. 2016).

370 Collecting details, such as those enabled by data-provenance capture software, is  
371 one innovative way forward. These tools have been developing in the computer-  
372 science domain for decades; however, only recently have they gained a foothold  
373 in ecology (Boose et al. 2007; Ellison 2010) or the broader scientific community.  
374 Although there are many challenges in the development and application of data-  
375 provenance principles, multiple software packages do exist for collecting data prove-  
376 nance in the context of scientific investigations. Two provenance capture packages  
377 exist in R, the `recordr` package associated with the DataOne repository (Cao et al.  
378 2016) and `RDataTracker` (Lerner and Boose 2014). In addition, although they do  
379 not collect formal data provenance, there are methods developed for “literate com-  
380 puting” that help to collect code along with details about the code and the intention  
381 of the analyses (e.g., the Jupyter notebook project: (Shen and Barabasi 2014)).

382 For ecological networks, there is software that captures the “data pedigree” of  
383 food-web models, but it does not capture data provenance. Data pedigree was ini-  
384 tially implemented in the EcoPath food-web modeling package (Guesnet et al. 2015;  
385 Heymans et al. 2016) to define confidence intervals and precision estimates for net-  
386 work edges. It has been developed further to allow for the use of informative priors  
387 in Bayesian modeling of ecological networks. This is done by linking models to the  
388 literature sources from which estimates were derived, an approach that is similar  
389 to incorporating metadata information within databases of ecological networks. Al-  
390 though this approach focuses only on a subcomponent of provenance, this still is a  
391 promising way to address the issue that networks, network metrics, and simulation  
392 models used to analyze them commonly assume a lack of uncertainty (e.g., Borrett  
393 and Osidele 2007; Kauffman et al. 2003; Kones et al. 2009), and typically ignore  
394 inaccuracy in the empirical data (Ascough et al. 2008; Gregr and Chan 2014).

## 395 **Moving Forward**

396 Development and application of new technologies (e.g., sequencing methods and com-  
397 putational, data-driven approaches) have the potential to increase both the abun-  
398 dance and quality of ecological networks. For the future development of network

399 ecology, there is a pressing need not only to share data and code, but also to inte-  
400 grate and use the large amounts of information enabled by technological advances.  
401 For example, synthetic networks (i.e., merging network models from different studies  
402 Poisot et al. 2016a) are a promising new direction; however, the structural proper-  
403 ties of synthetic networks and the behavior of network metrics applied to them will  
404 require careful investigation, including the application of systematic benchmarking.  
405 Multi-trophic networks provide a precedence for these studies to move forward, but  
406 synthesizing models from across many different sources produces new challenges for  
407 developing and benchmarking metrics, as well as an opportunity for new technolo-  
408 gies, like data provenance, to help establish better connections among studies and  
409 researchers.

410 The burgeoning of “open” culture in the sciences (Hampton et al. 2014) also has  
411 the potential to serve as a resource for models and a clearinghouse for resolving the  
412 validity of metrics, models, and algorithms. First, because code is openly shared,  
413 functions used to calculate metrics are open for inspection and, if coded and docu-  
414 mented clearly using software “best-practices” (e.g., Noble 2009; Visser et al. 2015),  
415 the code provides a transparent documentation of how a metric is implemented and  
416 its computational similarity to other metrics. Second, enabled by the ability to write  
417 their own functions and code, researchers can do numerical investigations of the sim-  
418 ilarities among metrics. Through comparison of metrics calculated on the same or  
419 similar network models, a researcher could at least argue, for a given set of models,  
420 that two or more metrics produce similar results. Third, data provenance provides a  
421 useful tool to aide in the dissemination and synthesis of network models and increases  
422 the reproducibility of ecological network studies, including those documenting new  
423 metrics and benchmarking those metrics and associated algorithms for generating or  
424 analyzing empirical models. Last, as with data provenance, formalizing ecological  
425 network metrics and concepts requires a mathematically rigorous foundation that is  
426 developed by the community of researchers working along parallel lines of inquiry.  
427 Whether this is done through an ontological approach or some other formalized  
428 “clearing-house,” an open process of exchange that integrates multiple perspectives  
429 is essential to prevent the rapid dilution of concepts in ecological network research  
430 as these concepts continue to proliferate, develop and evolve.

431 Over half a century ago, Robert MacArthur published his first paper on the rela-  
432 tionship between diversity and stability, initiating multiple research trajectories that  
433 have now become the mainstay of many ecological research programs (MacArthur  
434 1955). The theory that MacArthur applied was based on flows of energy through  
435 networks of interacting species. Thus, network theory is at the roots of one of the  
436 most widely studied topics in ecology and is now a part of the broader context of

437 integration across many scientific disciplines that is aimed at consilience of theory  
438 (Wilson 1999). The synthesis of ecological concepts through the mathematically  
439 rigorous “lingua franca” of network terminology has the potential to unify theo-  
440 ries across disciplines. As with previous concepts (e.g., keystone species, foundation  
441 species, ecosystem engineer), greater clarity and less redundancy will come about  
442 as network methods are used more commonly and researchers compare the mathe-  
443 matical and computational underpinnings of the metrics that they are using. With  
444 the increased use of these approaches, the network concept has and will continue to  
445 serve as a common model that transcends disciplines and has the potential to serve  
446 as an inroad for new approaches. With thoughtful dialogue across sub-disciplines  
447 and among research groups, further infusion of network theory and methods will  
448 continue to advance ecology.

## 449 **Acknowledgments**

450 This work was supported by the US National Science Foundation under grant SSI-  
451 1450277 End-to-End Provenance.

## 452 **Author contributions statement**

453 All authors contributed to the conception, writing and review of the manuscript.

## 454 **References**

- 455 Albert, R., A. L. Barabasi, and A.-L. Barabási. 2002. Statistical mechanics of  
456 complex networks. *Reviews of Modern Physics* **74**:47–97.
- 457 Allesina, S., and M. Pascual. 2008. Network structure, predatorprey modules, and  
458 stability in large food webs. *Theoretical Ecology* **1**:55–64.
- 459 Allesina, S., and M. Pascual. 2009. Food web models: A plea for groups. *Ecology*  
460 *Letters* **12**:652–662.
- 461 Allesina, S., and S. Tang. 2012. Stability criteria for complex ecosystems. *Nature*  
462 **483**:205–8.

- 463 Ascough, J., H. Maier, J. Ravalico, and M. Strudley. 2008. Future research challenges  
464 for incorporation of uncertainty in environmental and ecological decision-making.  
465 *Ecological Modelling* **219**:383–399.
- 466 Atmar, W., and B. D. Patterson. 1993. The measure of order and disorder in the  
467 distribution of species in fragmented habitat. *Oecologia* **96**:373–382.
- 468 Baird, D., and R. E. Ulanowicz. 1989. The seasonal dynamics of the Chesapeake  
469 Bay ecosystem. *Ecological Monographs* **59**:329–364.
- 470 Baiser, B., R. Elhessa, and T. Kahveci. 2016. Motifs in the assembly of food web  
471 networks. *Oikos* **125**:480–491.
- 472 Baiser, B., J. L. Lockwood, D. La Puma, and M. F. J. Aronson. 2008. A per-  
473 fect storm: two ecosystem engineers interact to degrade deciduous forests of New  
474 Jersey. *Biological Invasions* **10**:785–795.
- 475 Baker, M. 2016. 1,500 scientists lift the lid on reproducibility. *Nature* **533**:452–454.
- 476 Barabási, A.-L., and R. Albert. 1999. Emergence of scaling in random networks.  
477 *Science* **286**:509–512.
- 478 Barabási, A.-L., R. Albert, and H. Jeong. 2000. Scale-free characteristics of random  
479 networks: the topology of the world-wide web. *Physica A: statistical mechanics*  
480 *and its applications* **281**:69–77.
- 481 Bard, J. B. L., and S. Y. Rhee. 2004. Ontologies in biology: design, applications  
482 and future challenges. *Nature Reviews Genetics* **5**:213–222.
- 483 Bascompte, J. 2010. Structure and dynamics of ecological networks. *Science* **329**:765–  
484 6.
- 485 Bascompte, J., and P. Jordano. 2007. Plant-Animal Mutualistic Networks: The Ar-  
486 chitecture of Biodiversity. *Annual Review of Ecology, Evolution, and Systematics*  
487 **38**:567–593.
- 488 Bascompte, J., and P. Jordano. 2014. Mutualistic networks. Princeton University  
489 Press.
- 490 Beas-Luna, R., M. Novak, M. H. Carr, M. T. Tinker, A. Black, J. E. Caselle,  
491 M. Hoban, D. Malone, and A. Iles. 2014. An online database for informing  
492 ecological network models: <http://kelpforest.ucsc.edu>. *PLoS One* **9**:e109356.

- 493 Blüthgen, N. 2010. Why network analysis is often disconnected from community  
494 ecology: A critique and an ecologist’s guide. *Basic and Applied Ecology* **11**:185–  
495 195.
- 496 Blüthgen, N., J. Fründ, D. P. Vázquez, and F. Menzel. 2008. What do interac-  
497 tion network metrics tell us about specialization and biological traits? *Ecology*  
498 **89**:3387–3399.
- 499 Bonacich, P. 1987. Power and Centrality: A Family of Measures. *American Journal*  
500 *of Sociology* **92**:1170.
- 501 Boose, E. R., A. M. Ellison, L. J. Osterweil, L. A. Clarke, R. Podorozhny, J. L.  
502 Hadley, A. Wise, and D. R. Foster. 2007. Ensuring reliable datasets for environ-  
503 mental models and forecasts. *Ecological Informatics* **2**:237–247.
- 504 Boose, E. R., and B. S. Lerner, 2017. Replication of data analyses: Provenance  
505 in R. Pages 195–212 *in* A. Shavit and A. M. Ellison, editors. *Stepping in the*  
506 *Same River Twice: Replication in Biological Research*. Yale University Press, New  
507 Haven, Connecticut, USA.
- 508 Borgatti, S. P., and M. G. Everett. 2006. A Graph-theoretic perspective on centrality.  
509 *Social Networks* **28**:466–484.
- 510 Borrelli, J. J., S. Allesina, P. Amarasekare, R. Arditi, I. Chase, J. Damuth, R. D.  
511 Holt, D. O. Logofet, M. Novak, R. P. Rohr, A. G. Rossberg, M. Spencer, J. K.  
512 Tran, and L. R. Ginzburg. 2015. Selection on stability across ecological scales.  
513 *Trends in Ecology & Evolution* **30**:417–425.
- 514 Borrett, S. R. 2013. Throughflow centrality is a global indicator of the functional  
515 importance of species in ecosystems. *Ecological Indicators* **32**:182–196.
- 516 Borrett, S. R., W. Bridewell, P. Langely, and K. R. Arrigo. 2006. A method for  
517 representing and developing process models. *Ecological Complexity* **4**:28.
- 518 Borrett, S. R., R. R. Christian, and R. E. Ulanowicz, 2012. Network Ecology (Re-  
519 vised). Pages 1767–1772 *in* A. El-Shaarawi and W. Piegorsch, editors. *Encyclo-*  
520 *pedia of Environmetrics* (2nd edition). John Wiley and Sons, Chinchester, second  
521 edition.
- 522 Borrett, S. R., B. D. Fath, and B. C. Patten. 2007. Functional integration of  
523 ecological networks through pathway proliferation. *J. Theor. Biol.* **245**:98–111.



- 524 Borrett, S. R., and M. K. Lau. 2014. enaR: An R package for Ecosystem Network  
525 Analysis. *Methods in Ecology and Evolution* **11**:1206–1213.
- 526 Borrett, S. R., J. Moody, and A. Edelman. 2014. The rise of Network Ecology: Maps  
527 of the topic diversity and scientific collaboration. *Ecological Modelling* page 18.
- 528 Borrett, S. R., and O. O. Osidele. 2007. Environ indicator sensitivity to flux uncer-  
529 tainty in a phosphorus model of Lake Sidney Lanier, USA. *Ecological Modelling*  
530 **200**:371–383.
- 531 Borrvall, C., B. Ebenman, and T. Jonsson. 2000. Biodiversity lessens the risk of  
532 cascading extinction in model food webs. *Ecology Letters* **3**:131–136.
- 533 Brandes, U., and T. Erlebach. 2005. Network analysis: methodological foundations.  
534 Springer.
- 535 Brandes, U., G. Robins, A. McCranie, and S. Wasserman. 2013. What is network  
536 science? *Network Science* **1**:1–15.
- 537 Calabrese, J. M., and W. F. Fagan. 2004. A comparison-shopper’s guide to connec-  
538 tivity metrics. *Frontiers in Ecology and the Environment* **2**:529–536.
- 539 Cao, Y., C. Jones, V. Cuevas-Vicentín, M. B. Jones, B. Ludäscher, T. McPhillips,  
540 P. Missier, C. Schwalm, P. Slaughter, D. Vieglais, L. Walker, and Y. Wei, 2016.  
541 DataONE: A Data Federation with Provenance Support. Pages 230–234 . Springer  
542 International Publishing.
- 543 Carmel, Y., R. Kent, A. Bar-Massada, L. Blank, J. Liberzon, O. Nezer, G. Sapir, and  
544 R. Federman. 2013. Trends in ecological research during the last three decades—a  
545 systematic review. *PLoS One* **8**:e59813.
- 546 Cherrett, J. M., 1989. Key concepts: The results of a survey of our members’  
547 opinions. Pages 1–16 *in* J. M. Cherrett, A. D. Bradshaw, F. B. Goldsmith, P. G.  
548 Grubb, and J. R. Krebs, editors. *Ecological concepts: The contribution of ecology*  
549 *to an understanding of the natural world*. Blackwell Scientific Publications, Oxford,  
550 UK.
- 551 Cohen, J. E., and T. Luczak. 1992. Trophic levels in community food webs. *Evolu-*  
552 *tionary Ecology* **6**:73–89.
- 553 Colwell, R. K., and D. W. Winkler. 1984. A null model for null models in biogeog-  
554 raphy. Princeton University Press.

- 555 Connor, E. F., and D. Simberloff. 1979. The Assembly of Species Communities:  
556 Chance or Competition? *Ecology* **60**:1132.
- 557 Council, N. R. 2003. *Neon*. National Academies Press, Washington, D.C.
- 558 Creamer, R., S. Hannula, J. Van Leeuwen, D. Stone, M. Rutgers, R. Schmelz,  
559 P. De Ruiter, N. B. Hendriksen, T. Bolger, M.-L. Bouffaud, et al. 2016. Eco-  
560 logical network analysis reveals the inter-connection between soil biodiversity and  
561 ecosystem function as affected by land use across Europe. *Applied Soil Ecology*  
562 **97**:112–124.
- 563 Croft, D. P., J. Krause, and R. James. 2004. Social networks in the guppy *Poecilia*  
564 *reticulata*. *Proc. Royal Soc. Lond. B.* **271**:S516–S519.
- 565 Dame, R. F., and B. C. Patten. 1981. Analysis of energy flows in an intertidal oyster  
566 reef. *Marine Ecology Progress Series* **5**:115–124.
- 567 Dayton, P. K. 1972. Toward an understanding of community resilience and the  
568 potential effects of enrichment to the benthos at McMurdo Sound, Antarctica.  
569 *Proceedings of the Colloquium on Conservation Problems in Antarctica* pages 81–  
570 96.
- 571 Dormann, C. F., C. F. Dormann, J. Fründ, N. Blüthgen, and B. Gruber. 2009.  
572 Indices, Graphs and Null Models: Analyzing Bipartite Ecological Networks. *Open*  
573 *Ecology Journal* **2**:7–24.
- 574 Dubois, M., V. Rossi, E. Ser-Giacomi, S. Arnaud-Haond, C. López, and  
575 E. Hernández-García. 2016. Linking basin-scale connectivity, oceanography and  
576 population dynamics for the conservation and management of marine ecosystems.  
577 *Global Ecology and Biogeography* **25**:503–515.
- 578 Dunne, J. a., R. J. Williams, and N. D. Martinez. 2002. Network structure and  
579 biodiversity loss in food webs: Robustness increases with connectance. *Ecology*  
580 *Letters* **5**:558–567.
- 581 Eklöf, A., and B. Ebenman. 2006. Species loss and secondary extinctions in simple  
582 and complex model communities. *Journal of Animal Ecology* **75**:239–246.
- 583 Eklöf, A., M. R. Helmus, M. Moore, and S. Allesina. 2012. Relevance of evolutionary  
584 history for food web structure. *Proc. Royal Soc. B* **279**:1588–96.

- 585 Ellison, A. M. 2010. Repeatability and transparency in ecological research. *Ecology*  
586 **91**:2536–2539.
- 587 Ellison, A. M., M. S. Bank, B. D. Clinton, E. A. Colburn, K. Elliott, C. R. Ford, D. R.  
588 Foster, B. D. Kloeppel, J. D. Knoepp, G. M. Lovett, J. Mohan, D. A. Orwig, N. L.  
589 Rodenhouse, W. V. Sobczak, K. A. Stinson, J. K. Stone, C. M. Swan, J. Thompson,  
590 B. Von Holle, and J. R. Webster. 2005. Loss of foundation species: consequences  
591 for the structure and dynamics of forested ecosystems. *Frontiers in Ecology and*  
592 *the Environment* **3**:479–486.
- 593 Erdős, P., and a. Rényi. 1959. On random graphs. *Publicationes Mathematicae*  
594 **6**:290–297.
- 595 Estrada, E., 2015. *Introduction to Complex Networks: Structure and Dynamics*.  
596 Pages 93–131 . Springer International Publishing.
- 597 Eugster, M. J. A., and F. Leisch, 2008. Bench Plot and Mixed Effects Models:  
598 First Steps toward a Comprehensive Benchmark Analysis Toolbox. Pages 299–  
599 306 *in* P. Brito, editor. *Compstat 2008—Proceedings in Computational Statistics*.  
600 Physica Verlag, Heidelberg, Germany.
- 601 Fang, D., B. D. Fath, B. Chen, and U. M. Scharler. 2014. Network environ analysis  
602 for socio-economic water system. *Ecological Indicators* **47**:80–88.
- 603 Fath, B. D. 2004. Network analysis applied to large-scale cyber-ecosystems. *Ecolog-*  
604 *ical Modeling* **171**:329–337.
- 605 Fath, B. D., U. M. Scharler, R. E. Ulanowicz, and B. Hannon. 2007. Ecological  
606 network analysis: network construction. *Ecological Modelling* **208**:49–55.
- 607 Finn, J. T. 1976. Measures of ecosystem structure and function derived from analysis  
608 of flows. *Journal of theoretical biology* **56**:363–380.
- 609 Finn, J. T. 1980. Flow analysis of models of the Hubbard Brook ecosystem. *Ecology*  
610 **61**:562–571.
- 611 Fletcher, R. J., A. Revell, B. E. Reichert, W. M. Kitchens, J. D. Dixon, and J. D.  
612 Austin. 2013. Network modularity reveals critical scales for connectivity in ecology  
613 and evolution. *Nature Communications* **4**:2572–2576.
- 614 Fortuna, M. A., R. Ortega, and J. Bascompte. 2014. The Web of Life. [www.web-of-](http://www.web-of-life.es)  
615 [life.es](http://www.web-of-life.es) .

- 616 Freeman, L. C. 1979. Centrality in networks. I. Conceptual clarificaiton. *Social*  
617 *Networks* **1**:215–239.
- 618 Golley, F. 1993. A history of the ecosystem concept in ecology: More than the sum  
619 of the parts. Yale University Press, New Haven, CT.
- 620 Golubski, A. J., E. E. Westlund, J. Vandermeer, and M. Pascual. 2016. Ecological  
621 Networks over the Edge: Hypergraph Trait-Mediated Indirect Interaction (TMII)  
622 Structure. *Trends in Ecology & Evolution* .
- 623 Gotelli, N. J. 2000. Null model analysis of species co-occurrence patterns. *Ecology*  
624 **81**:2606–2621.
- 625 Gotelli, N. J., R. M. Dorazio, A. M. Ellison, and G. D. Grossman. 2010. Detecting  
626 temporal trends in species assemblages with bootstrapping procedures and hierar-  
627 chical models. *Philosophical transactions of the Royal Society of London. Series*  
628 *B, Biological sciences* **365**:3621–3631.
- 629 Gotelli, N. J., A. M. Ellison, and B. A. Ballif. 2012. Environmental proteomics,  
630 biodiversity statistics and food-web structure. *Trends in Ecology & Evolution*  
631 **27**:436–42.
- 632 Gotelli, N. J., and G. R. Graves. 1996. Null models in ecology. *Ecology* **14**:368.
- 633 Gotelli, N. J., and W. Ulrich, 2012. Statistical challenges in null model analysis.
- 634 Graham, M. H., and P. K. Dayton. 2002. On the evolution of ecological ideas:  
635 paradigms and scientific progress. *Ecology* **83**:1481–1489.
- 636 Gregr, E. J., and K. M. A. Chan. 2014. Leaps of Faith: How Implicit Assumptions  
637 Compromise the Utility of Ecosystem Models for Decision-making. *BioScience*  
638 **65**:43–54.
- 639 Grilli, J., T. Rogers, and S. Allesina. 2016. Modularity and stability in ecological  
640 communities. *Nature Communications* **7**:12031–12041.
- 641 Guesnet, V., G. Lassalle, A. Chaalali, K. Kearney, B. Saint-Béat, B. Karimi,  
642 B. Grami, S. Tecchio, N. Niquil, and J. Lobry. 2015. Incorporating food-web  
643 parameter uncertainty into Ecopath-derived ecological network indicators. *Eco-*  
644 *logical Modelling* **313**:29–40.

- 645 Guimarães, P. R., G. Machado, M. A. M. de Aguiar, P. Jordano, J. Bascompte,  
646 A. Pinheiro, and S. F. Dos Reis. 2007. Build-up mechanisms determining the  
647 topology of mutualistic networks. *Journal of theoretical biology* **249**:181–9.
- 648 Hampton, S. E., S. Anderson, S. C. Bagby, and C. Gries. 2014. The Tao of Open  
649 Science for Ecology. *PeerJ* pages 1–30.
- 650 Heymans, J. J., M. Coll, J. S. Link, S. Mackinson, J. Steenbeek, C. Walters, and  
651 V. Christensen. 2016. Best practice in Ecopath with Ecosim food-web models for  
652 ecosystem-based management. *Ecological Modelling* **331**:173–184.
- 653 Hines, D. E., and S. R. Borrett. 2014. A comparison of network, neighborhood, and  
654 node levels of analyses in two models of nitrogen cycling in the Cape Fear River  
655 Estuary. *Ecological Modelling* **293**:210–220.
- 656 Hodges, K. E. 2008. Defining the problem: terminology and progress in ecology.  
657 *Frontiers in Ecology and the Environment* **6**:35–42.
- 658 Hollenberg, D. 2007. On the evolution and dynamics of biological networks. *Rivista  
659 di biologia* **100**:93–118.
- 660 Holstein, D. M., C. B. Paris, and P. J. Mumby. 2014. Consistency and inconsistency  
661 in multispecies population network dynamics of coral reef ecosystems. *Marine  
662 Ecology Progress Series* **499**:1–18.
- 663 Holt, R., 1997. Community modules. Pages 333–349 *in* *Multitrophic interactions in  
664 terrestrial ecosystems*, 36th Symposium of the British Ecological Society. Blackwell  
665 Science Oxford.
- 666 Holt, R. D., and M. F. Hoopes. 2005. Food web dynamics in a metacommunity  
667 context. *Metacommunities: Spatial dynamics and ecological communities* pages  
668 68–93.
- 669 Ings, T. C., J. M. Montoya, J. Bascompte, N. Blüthgen, L. Brown, C. F. Dormann,  
670 F. Edwards, D. Figueroa, U. Jacob, J. I. Jones, R. B. Lauridsen, M. E. Ledger,  
671 H. M. Lewis, J. M. Olesen, F. J. F. van Veen, P. H. Warren, and G. Woodward.  
672 2009. Ecological networks—beyond food webs. *The Journal of animal ecology*  
673 **78**:253–69.
- 674 Jacoby, D. M. P., and R. Freeman. 2016. Emerging network-based tools in movement  
675 ecology. *Trends in Ecology & Evolution* **31**:301–314.

- 676 Jones, C. G., J. H. Lawton, and M. Shachak. 1994. Organisms as Ecosystem Engi-  
677 neers. *Oikos* **69**:373–386.
- 678 Jordán, F., Z. Benedek, and J. Podani. 2007. Quantifying positional importance in  
679 food webs: A comparison of centrality indices. *Ecological Modelling* **205**:270–275.
- 680 Jørgensen, S. E., B. C. Patten, and M. Straškraba. 2000. Ecosystems emerging: 4.  
681 Growth. *Ecological Modelling* **126**:249–284.
- 682 Kauffman, S., C. Peterson, B. R. Samuelsson, C. Troein, and P. W. Anderson. 2003.  
683 Random Boolean network models and the yeast transcriptional network. *PNAS*  
684 **100**:14796–14799.
- 685 Kazanci, C., and Q. Ma, 2015. Chapter 3 System-wide measures in ecological net-  
686 work analysis. Pages 45–68 *in* Y.-S. Park, S. Lek, C. Baehr, and S. E. Jorgensen,  
687 editors. *Advanced Modelling Techniques Studying Global Changes in Environmen-  
688 tal Sciences*, volume 27. Elsevier.
- 689 Kéfi, S., E. L. Berlow, E. A. Wieters, S. A. Navarrete, O. L. Petchey, S. A. Wood,  
690 A. Boit, L. N. Joppa, K. D. Lafferty, R. J. Williams, N. D. Martinez, B. A. Menge,  
691 C. A. Blanchette, A. C. Iles, and U. Brose. 2012. More than a meal{...} integrating  
692 non-feeding interactions into food webs. *Ecology Letters* **15**:291–300.
- 693 Kones, J. K., K. Soetaert, D. van Oevelen, and J. O. Owino. 2009. Are network  
694 indices robust indicators of food web functioning? A Monte Carlo approach. *Eco-  
695 logical Modelling* **220**:370–382.
- 696 Krause, A. E., K. A. Frank, D. M. Mason, R. E. Ulanowicz, and W. W. Taylor. 2003.  
697 Compartments revealed in food-web structure. *Nature* **426**:282–5.
- 698 Langfelder, P., and S. Horvath. 2008. WGCNA: an R package for weighted correlation  
699 network analysis. *BMC bioinformatics* **9**:559.
- 700 Lau, M. K., S. R. Borrett, D. E. Hines, and P. Singh, 2015. enaR: Tools for Ecological  
701 Network Analysis.
- 702 Layton, A., B. Bras, and M. Weissburg. 2016. Ecological Principles and Metrics  
703 for Improving Material Cycling Structures in Manufacturing Networks. *Journal of  
704 Manufacturing Science and Engineering* **138**:101002.
- 705 Lédée, E. J. I., M. R. Heupel, A. J. Tobin, A. Mapleston, and C. A. Simpfendorfer.  
706 2016. Movement patterns of two carangid species in inshore habitats characterised  
707 using network analysis. *Marine Ecology Progress Series* **553**:219–232.

- 708 Legendre, P., L. Legendre, L. Legendre, and P. Legendre. 2012. Numerical ecology.  
709 Elsevier.
- 710 Lerner, B., and E. Boose, 2014. RDataTracker: Collecting Provenance in an Interac-  
711 tive Scripting Environment. Pages 1–4 *in* 6th USENIX Workshop on the Theory  
712 and Practice of Provenance (TaPP 2014). USENIX Association, Cologne.
- 713 Lima, M. 2011. Visual Complexity: Mapping Patterns of Information. Princeton  
714 Architectural Press.
- 715 Lindeman, R. L. 1942. The trophic-dynamic aspect of ecology. *Ecology* **23**:399–418.
- 716 Lowndes, J. S. S., B. D. Best, C. Scarborough, J. C. Afflerbach, M. R. Frazier, C. C.  
717 O’Hara, N. Jiang, and B. S. Halpern. 2017. Our path to better science in less time  
718 using open data science tools. *Nature Ecology & Evolution* **1**:0160.
- 719 Lubchenco, J., A. M. Olson, L. B. Brubaker, S. R. Carpenter, M. M. Holland, S. P.  
720 Hubbell, S. A. Levin, J. A. MacMahon, P. A. Matson, J. M. Melillo, H. A. Mooney,  
721 C. H. Peterson, and H. Ronald Pulliam. 1991. The Sustainable Biosphere Initiative:  
722 An Ecological Research Agenda: A Report from the Ecological Society of America.  
723 *Risser Source: Ecology* **72**:371–412.
- 724 Ludovisi, A., and U. M. Scharler. 2017. Towards a sounder interpretation of entropy-  
725 based indicators in ecological network analysis. *Ecological Indicators* **72**:726–737.
- 726 MacArthur, R. 1955. Fluctuations of Animal Populations and a Measure of Com-  
727 munity Stability. *Ecology* **36**:533.
- 728 Manly, B. F. J. 2007. Randomization, bootstrap and Monte Carlo methods in  
729 biology. Chapman and Hall.
- 730 Margalef, R. 1963. Certain unifying principles in ecology. *The American Naturalist*  
731 **97**:357–374.
- 732 Martinez, N. D., 1992. Constant Connectance in Community Food Webs.
- 733 Maslov, S., and K. Sneppen. 2002. Specificity and stability in topology of protein  
734 networks. *Science* **296**:910–3.
- 735 May, R. M. 1972. Will a Large Complex System be Stable? *Nature* **238**:413–414.
- 736 May, R. M. 2001. Stability and Complexity in Model Ecosystems. Princeton Uni-  
737 versity Press.

- 738 May, R. M. 2006. Network structure and the biology of populations. *Trends in*  
739 *Ecology & Evolution* **21**:394–399.
- 740 McNutt, M., K. Lehnert, B. Hanson, B. A. Nosek, A. M. Ellison, and J. L. King.  
741 2016. Liberating field science samples and data. *Science* **351**:1024–1026.
- 742 Milo, R., S. Shen-Orr, S. Itzkovitz, N. Kashtan, D. Chklovskii, U. Alon, S. H. Stro-  
743 gatz, D. Watts, S. H. Strogatz, A.-L. Barabási, R. Albert, M. Newman, H. Jeong,  
744 B. Tombor, R. Albert, Z. N. Oltvai, A. L. Barabasi, R. F. Cancho, C. Janssen,  
745 R. V. Sole, R. F. Cancho, R. V. Sole, L. Amaral, A. Scala, M. Barthelemy,  
746 H. Stanley, B. Huberman, L. Adamic, S. Shen-Orr, R. Milo, S. Mangan, U. Alon,  
747 N. Guelzim, S. Bottani, P. Bourguine, F. Kepes, M. Newman, S. H. Strogatz,  
748 D. Watts, S. Maslov, K. Sneppen, D. Thieffry, A. M. Huerta, E. Perez-Rueda,  
749 J. Collado-Vides, M. C. Costanzo, R. Williams, N. Martinez, S. Pimm, J. Law-  
750 ton, J. Cohen, J. White, E. Southgate, J. Thomson, S. Brenner, D. Callaway,  
751 J. Hopcroft, J. Kleinberg, M. Newman, and S. H. Strogatz. 2002. Network motifs:  
752 simple building blocks of complex networks. *Science* **298**:824–7.
- 753 Newman, M. 2010. *Networks an Introduction*. Oxford University Press.
- 754 Newman, M. E. J., 2003. *The Structure and Function of Complex Networks*.
- 755 Newman, M. E. J. 2006. Modularity and community structure in networks. *PNAS*  
756 **103**:8577–82.
- 757 Newman, M. E. J., A. Clauset, C. Aicher, A. Z. Jacobs, A. Clauset, S. Fortunato,  
758 P. Holme, M. Huss, H. Jeong, R. Guimerà, L. A. N. Amaral, D. Hric, R. K. Darst,  
759 S. Fortunato, M. Barthélemy, A. Z. Jacobs, A. Clauset, K. Zuev, G. B. M. Boguñá,  
760 D. Krioukov, B. H. Good, Y.-A. d. Montjoye, A. Clauset, C. Bothorel, J. D. Cruz,  
761 M. Magnani, B. Micenková, N. Binkiewicz, J. T. Vogelstein, K. Rohe, E. Gal-  
762 brun, A. Gionis, N. Tatti, T. J. Hansen, M. W. Mahoney, Y. Zhang, E. Levina,  
763 J. Zhu, P. Expert, T. S. Evans, V. D. Blondel, R. Lambiotte, L. Peel, P. Zhang,  
764 C. Moore, L. Zdeborová, X. Maa, L. Gaoa, X. Yongb, L. Fua, Z.-Y. Zhang, P. W.  
765 Holland, K. B. Laskey, S. Leinhardt, B. Karrer, M. E. J. Newman, A. Decelle,  
766 F. Krzakala, C. Moore, L. Zdeborová, E. Mossel, J. Neeman, A. Sly, J. Moody,  
767 L. Danon, J. Duch, A. Diaz-Guilera, A. Arenas, A. F. McDaid, D. Greene, N. Hur-  
768 ley, U. Brose, G. Woodward, A. L. Traud, P. J. Mucha, M. A. Porter, P. C. Bull,  
769 D. B. Larremore, A. Clauset, C. Z. Buckee, D. B. Larremore, A. Clauset, A. Z.  
770 Jacobs, G. M. Warimwe, P. C. Bull, A. Clauset, C. Moore, M. E. J. Newman,  
771 R. Milo, S. P. Borgatti, M. G. Everett, B. Ball, M. E. J. Newman, P. D. Hoff,



- 772 A. E. Rafferty, and M. S. Handcock. 2016. Structure and inference in annotated  
773 networks. *Nature Communications* **7**:11863.
- 774 Newman, M. E. J., S. H. Strogatz, and D. J. Watts. 2001. Random graphs with  
775 arbitrary degree distributions and their applications. *Physical Review E* **64**:026118.
- 776 Noble, W. S. 2009. A quick guide to organizing computational biology projects.  
777 *PLoS computational biology* **5**:e1000424.
- 778 Odum, H. T. 1957. Trophic structure and productivity of Silver Springs, Florida.  
779 *Ecol. Mono.* **27**:55–112.
- 780 Odum, H. T., and R. C. Pinkerton. 1955. Time's speed regulator: the optimum  
781 efficiency for maximum power output in physical and biological systems. *American*  
782 *Scientist* **43**:331–343.
- 783 Paine, R. T. 1966. Food Web Complexity and Species Diversity. *The American*  
784 *Naturalist* **100**:65.
- 785 Parker, T. H., S. Nakagawa, and J. Gurevitch. 2016. Promoting transparency in  
786 evolutionary biology and ecology. *Ecology Letters* **19**:726–728.
- 787 Patten, B. C. 1978. Systems approach to the concept of environment. *Ohio Journal*  
788 *of Science* **78**:206–222.
- 789 Patten, B. C., and G. T. Auble. 1981. System theory of the ecological niche. *American*  
790 *Naturalist* **117**:893–922.
- 791 Patten, B. C., and M. Witkamp. 1967. Systems analysis of <sup>137</sup>cesium kinetics in  
792 terrestrial microcosms. *Ecology* **48**:813–824.
- 793 Petanidou, T., A. S. Kallimanis, J. Tzanopoulos, S. P. Sgardelis, and J. D. Pantis.  
794 2008. Long-term observation of a pollination network: Fluctuation in species and  
795 interactions, relative invariance of network structure and implications for estimates  
796 of specialization. *Ecology Letters* **11**:564–575.
- 797 Pimm, S. L. 1982. *Food webs*. Chapman and Hall, London; New York.
- 798 Poisot, T., B. Baiser, J. A. Dunne, S. Kéfi, F. Massol, N. Mouquet, T. N. Romanuk,  
799 D. B. Stouffer, S. A. Wood, and D. Gravel. 2015. mangal making ecological  
800 network analysis simple. *Ecography* **39**:384–390.

- 801 Poisot, T., D. Gravel, S. Leroux, S. A. Wood, M.-J. Fortin, B. Baiser, A. R. Cirtwill,  
802 M. B. Araújo, and D. B. Stouffer. 2016*a*. Synthetic datasets and community tools  
803 for the rapid testing of ecological hypotheses. *Ecography* **39**:402–408.
- 804 Poisot, T., D. B. Stouffer, and S. Kéfi. 2016*b*. Describe, understand and predict:  
805 why do we need networks in ecology? *Functional Ecology* **30**:1878–1882.
- 806 Post, D. M., M. L. Pace, and N. G. Hairston. 2000. Ecosystem size determines  
807 food-chain length in lakes. *Nature* **405**:1047–1049.
- 808 Proulx, S. R., D. E. L. Promislow, and P. C. Phillips. 2005. Network thinking in  
809 ecology and evolution. *Trends in Ecology & Evolution* **20**:345–53.
- 810 QUINTESSENCE Consortium, M. E., S. Carpenter, e. al., G. Daily, e. al.,  
811 C. Raudsepp-Hearne, e. al., I. P. o. B. Services, Ecosystem, J. Silvertown,  
812 M. Schröter, e. al., S. Naeem, e. al., N. Biggs, e. al., A. Mashaghi, e. al., T. Ideker,  
813 R. Sharan, J. Gardy, e. al., T. Valente, D. Acemoglu, e. al., M. Jackson, M. Janssen,  
814 e. al., G. Woodward, e. al., C. Mulder, J. Elser, R. Thompson, e. al., J. Mon-  
815 toya, e. al., O. Petchey, e. al., J. Reiss, e. al., A. Barabasi, R. Albert, F. Harary,  
816 R. Haines-Young, S. Macfadyen, e. al., K. Rathwell, G. Peterson, R. Costanza,  
817 I. Kubiszewski, C. Mulder, e. al., H. Tallis, e. al., A. Tavoni, S. Levin, A. Ma,  
818 R. Mondragón, M. Pascual, J. Dunne, F. Jordán, e. al., H. Ernstson, e. al.,  
819 U. Narloch, e. al., M. Hagen, e. al., R. Stewart, e. al., A. Shmida, M. Wilson,  
820 M. Palmer, e. al., G. Mace, e. al., R. d. Groot, e. al., H. Zimmermann, R. Albert,  
821 e. al., M. Pockock, e. al., K. Chan, e. al., L. Dicks, e. al., G. McInerney, e. al.,  
822 M. Pockock, e. al., A. Vespignani, D. Bohan, e. al., P. Anderson, J. Cohen, e. al.,  
823 J. Montoya, e. al., S. Pimm, C. Holling, A. Trichard, e. al., D. Bohan, and e. al.  
824 2016. Networking Our Way to Better Ecosystem Service Provision. *Trends in*  
825 *Ecology & Evolution* **31**:105–15.
- 826 R Core Team, 2017. R: A Language and Environment for Statistical Computing. R  
827 Foundation for Statistical Computing, Vienna, Austria.
- 828 Samuelson, P. A. 1948. *Economics: An Introductory Analysis*. McGraw–Hill Book  
829 Co., New York,.
- 830 Shen, H.-W., and A.-L. Barabasi. 2014. Collective credit allocation in science. *PNAS*  
831 **111**:12325–12330.
- 832 Sih, A., S. F. Hanser, and K. a. McHugh. 2009. Social network theory: New insights  
833 and issues for behavioral ecologists. *Behavioral Ecology and Sociobiology* **63**:975–  
834 988.

- 835 Simberloff, D., and B. V. Holle. 1999. Positive interactions of nonindigenous species:  
836     invasional meltdown? *Biological Invasions* pages 21–32.
- 837 Solé, R. V., and J. M. Montoya. 2001. Complexity and fragility in ecological networks.  
838     *Proc. Royal Soc. B* **268**:2039–2045.
- 839 Stouffer, D. B., and J. Bascompte. 2010. Understanding food-web persistence from  
840     local to global scales. *Ecology Letters* **13**:154–161.
- 841 Strogatz, S. H. 2001. Exploring complex networks. *Nature* **410**:268–76.
- 842 Stumpf, M. P. H., W. P. Kelly, T. Thorne, and C. Wiuf. 2007. Evolution at the  
843     system level: the natural history of protein interaction networks. *Trends in Ecology*  
844     & *Evolution* **22**:366–373.
- 845 Sutherland, W. J., R. P. Freckleton, H. C. J. Godfray, S. R. Beissinger, T. Ben-  
846     ton, D. D. Cameron, Y. Carmel, D. A. Coomes, T. Coulson, M. C. Emmerson,  
847     R. S. Hails, G. C. Hays, D. J. Hodgson, M. J. Hutchings, D. Johnson, J. P. G.  
848     Jones, M. J. Keeling, H. Kokko, W. E. Kunin, X. Lambin, O. T. Lewis, Y. Malhi,  
849     N. Mieszkowska, E. J. Milner-Gulland, K. Norris, A. B. Phillimore, D. W. Purves,  
850     J. M. Reid, D. C. Reuman, K. Thompson, J. M. J. Travis, L. A. Turnbull, D. A.  
851     Wardle, and T. Wiegand. 2013. Identification of 100 fundamental ecological ques-  
852     tions. *Journal of Ecology* **101**:58–67.
- 853 Tansley, A. G. 1935. The Use and Abuse of Vegetational Concepts and Terms.  
854     *Ecology* **16**:284–307.
- 855 Ulanowicz, R. E., 1986. Introduction. Pages 1–8 *in* *Growth and Development*.  
856     Springer New York, New York, NY.
- 857 Ulanowicz, R. E., R. D. Holt, and M. Barfield. 2014. Limits on ecosystem trophic  
858     complexity: insights from ecological network analysis. *Ecology letters* **17**:127–36.
- 859 Ulrich, W., and N. J. Gotelli. 2007. Null model analysis of species nestedness  
860     patterns. *Ecology* **88**:1824–1831.
- 861 Ulrich, W., and N. J. Gotelli. 2010. Null model analysis of species associations using  
862     abundance data. *Ecology* **91**:3384–97.
- 863 Urban, D., and T. Keitt. 2001. Landscape connectivity: A graph-theoretic perspec-  
864     tive. *Ecology* **82**:1205–1218.

- 865 Valente, T. W., K. Coronges, C. Lakon, and E. Costenbader. 2008. How Correlated  
866 Are Network Centrality Measures? *Connections* **28**:16–26.
- 867 Vermaat, J. E., J. a. Dunne, and A. J. Gilbert. 2009. Major dimensions in food-web  
868 structure properties. *Ecology* **90**:278–282.
- 869 Visser, M. D., S. M. McMahon, C. Merow, P. M. Dixon, S. Record, E. Jongejans,  
870 W. Michener, M. Jones, S. Petrovskii, N. Petrovskaya, A. Ellison, B. Dennis,  
871 G. Hager, G. Wellein, P. Zuidema, E. Jongejans, P. Chien, H. During, F. Schiev-  
872 ing, B. V. Putten, M. Visser, H. Muller-Landau, P. Jansen, L. Comita, H. Muller-  
873 Landau, S. Aguilar, S. Hubbell, C. Merow, N. LaFleur, J. Silander, A. Wilson,  
874 M. Rubega, M. Visser, E. Jongejans, M. V. Breugel, P. Zuidema, Y.-Y. Chen,  
875 A. Kassim, J. Chambers, B. Kernighan, P. Plauger, G. Amdahl, A. Porter,  
876 R. Selby, R. Bryant, D. OHallaron, M. Schmidberger, M. Morgan, D. Eddel-  
877 buettel, H. Yu, L. Tierney, U. Mansmann, A. Grama, G. Karypis, V. Kumar,  
878 A. Gupta, P. LEcuyer, D. Eddelbuettel, R. François, D. Eddelbuettel, C. Sander-  
879 son, H. Robbins, S. Monro, A. Mantoglou, J. Wilson, A. Finley, Z. Merali,  
880 A. Guisan, A. Lehmann, S. Ferrier, M. Austin, J. Overton, B. Brook, J. OGrady,  
881 A. Chapman, M. Burgman, H. Akçakaya, R. Frankham, F. Isbell, V. Calcagno,  
882 A. Hector, J. Connolly, W. Harpole, P. Reich, E. V. Moran, J. Clark, G. Bohrer,  
883 G. Katul, R. Walko, and R. Avissar. 2015. Speeding Up Ecological and Evolution-  
884 ary Computations in R; Essentials of High Performance Computing for Biologists.  
885 *PLoS Computational Biology* **11**:e1004140.
- 886 Wang, S., and B. Chen. 2016. Energy-water nexus of urban agglomeration based on  
887 multiregional input-output tables and ecological network analysis: A case study  
888 of the Beijing-Tianjin-Hebei region. *Applied Energy* **178**:773–783.
- 889 Wasserman, S., and K. Faust. 1994. *Advances in Social Network Analysis: Research*  
890 *in the Social and Behavioral Sciences*. SAGE Publications.
- 891 Williams, R. J., E. L. Berlow, J. a. Dunne, A.-L. Barabási, and N. D. Martinez.  
892 2002. Two degrees of separation in complex food webs. *PNAS* **99**:12913–12916.
- 893 Williams, R. J., and N. D. Martinez. 2000. Simple rules yield complex food webs.  
894 *Nature* **404**:180–183.
- 895 Wilson, E. O. 1999. *Consilience: The unity of knowledge*. Vintage.
- 896 Woodward, G. U. Y., J. P. Benstead, O. S. Beveridge, J. Blanchard, T. Brey, L. E.  
897 E. E. Brown, W. F. Cross, N. Friberg, C. Ings, U. T. E. Jacob, S. Jennings, M. E.

- 898 Ledger, A. M. Milner, J. M. Montoya, E. O. Gorman, J. M. Olesen, O. L. Petchey,  
899 E. Pichler, D. C. Reuman, M. S. A. Thompson, F. J. F. V. a. N. Veen, G. Yvon-  
900 Durocher, T. C. Ings, U. T. E. Jacob, S. Jennings, M. E. Ledger, A. M. Milner,  
901 J. M. Montoya, E. O 'gorman, J. M. Olesen, O. L. Petchey, D. E. Pichler, D. C.  
902 Reuman, M. S. A. Thompson, F. J. F. Van Veen, and G. Yvon-Durocher. 2010.  
903 Ecological Networks in a Changing Climate. *Advances In Ecological Research* 42.  
904 Ecological Networks. **42**:72–120.
- 905 Xia, L., B. D. Fath, U. M. Scharler, and Y. Zhang. 2016. Spatial variation in  
906 the ecological relationships among the components of Beijing's carbon metabolic  
907 system. *Science of the Total Environment* **544**:103–113.
- 908 Yang, J., and B. Chen. 2016. Energy–water nexus of wind power generation systems.  
909 *Applied Energy* **169**:1–13.
- 910 Yodzis, P., and S. Innes. 1992. Body Size and Consumer-Resource Dynamics. *The*  
911 *American Naturalist* **139**:1151–1175.
- 912 Zhao, L., H. Zhang, E. J. O'Gorman, W. Tian, A. Ma, J. C. Moore, S. R. Borrett,  
913 and G. Woodward. 2016. Weighting and indirect effects identify keystone species  
914 in food webs. *Ecology Letters* **19**:1032–1040.
- 915 Zinkgraf, M., L. Liu, A. Groover, and V. Filkov. 2017. Identifying gene coexpression  
916 networks underlying the dynamic regulation of wood-forming tissues in *Populus*  
917 under diverse environmental conditions. *New Phytologist* **214**:1464–1478.

## 918 Boxes

919 *Box 1. Benchmarking Ecological Models* The most basic test is to feed the algorithm  
920 a set of "random" matrices to make sure that the frequency of statistically significant  
921 results is no greater than 5%. Otherwise, the algorithm is vulnerable to a Type I  
922 statistical error (incorrectly rejecting a true null hypothesis). However, specifying a  
923 matrix produced by random sampling errors is not so easy. By definition, if a null  
924 model algorithm is used to generate the random matrices, then no more than 5%  
925 of them should be statistically significant (unless there were programming errors).  
926 For binary matrices, two log-normal distributions can be used to generate realistic  
927 heterogeneity in row and column totals, while still maintaining additive effects for cell  
928 occurrence probabilities (Ulrich and Gotelli 2010). "Structured" matrices are needed  
929 to test for Type II errors (incorrectly accepting a false null hypothesis), and these  
930 require a careful consideration of exactly what sort of pattern or mechanism the test  
931 is designed to reveal. One approach is to begin with a perfectly structured matrix,  
932 such as one derived from a mechanistic model for generating network structure,  
933 contaminate it with increasing amounts of stochastic noise, and test for the statistical  
934 pattern at each step (Gotelli 2000). A plot of the  $P$  value versus the added noise  
935 should reveal an increasing curve, and will indicate the signal-to-noise ratio below  
936 which the test cannot distinguish the pattern from randomness. Alternatively, one  
937 can begin with a purely random matrix but embed in it a non-random substructure,  
938 such as a matrix clique or a node with extreme centrality. The size, density, and  
939 other attributes of this matrix can be manipulated to see whether the test can still  
940 detect the presence of the embedded structure (Gotelli et al. 2010). Because all  
941 null model tests (and all frequentist statistics) are affected by sample size and data  
942 structure, these benchmark tests can be tailored to the attributes of the empirical  
943 data structures for better focus and improved inference.

944 Even simple randomization algorithms may require further filters to ensure that  
945 random matrices retain a number of desirable network properties. For example,  
946 Dunne et al. (2002) created random food-web matrices with constant species rich-  
947 ness and connectance, but they discarded webs with unconnected nodes and subwebs  
948 because these topologies were not observed in the empirical webs. A "stub recon-  
949 struction" algorithm builds a topology that is constrained to the observed number  
950 of edges per node (Newman et al. 2001). Each node is assigned the correct number  
951 of edges, and then nodes are successively and randomly paired to create a growing  
952 network. However, this algorithm also generates multiple edges between the same  
953 two nodes, which must be discarded or otherwise accounted for. Maslov and Sneppen  
954 (2002) use a "local re-wiring algorithm" that preserves the number of connections

955 for every node by swapping edges randomly between different pairs of nodes. This  
956 algorithm is closely analogous to the swap algorithm used in species co-occurrence  
957 analyses that preserves the row and column totals of the original matrix (Connor  
958 and Simberloff 1979). The more constraints that are added to the algorithm, the  
959 less likely it is that simple sampling processes can account for patterns in the data.  
960 However, some constraints, such as connectivity or matrix density, may inadvertently  
961 “smuggle in” the very processes they are designed to detect. This can lead to the  
962 so-called “Narcissus” effect (Colwell and Winkler 1984). Finding the correct balance  
963 between realistic constraints and statistical power is not easy (Gotelli et al. 2012),  
964 and there are many potential algorithms that reasonably could be used, even for  
965 simple binary matrices (Gotelli 2000).

966 **Tables**

| Sub.discipline | Level | Metric                  | Concept                                                                                                                                                  | Reference                                                                                      |
|----------------|-------|-------------------------|----------------------------------------------------------------------------------------------------------------------------------------------------------|------------------------------------------------------------------------------------------------|
| General        | W     | Density                 | The proportion of possible edges that are actually associated with nodes; called Connectance in Food Web ecology.                                        |                                                                                                |
| General        | N     | Centrality              | Multiple ways to characterize the relative importance of nodes.                                                                                          | Wasserman and Faust (1994)                                                                     |
| General        | N     | Degree                  | Number of edges connected to a given node, which is a type of local centrality.                                                                          |                                                                                                |
| General        | N     | Eigenvector Centrality  | Global centrality metric based on number of walks that travel through a node                                                                             | Bonacich (1987)                                                                                |
| General        | W     | Centrality Distribution | Shape of the frequency distribution of edges among nodes.                                                                                                | Barabási and Albert (1999); Dunne et al. (2002)                                                |
| General        | W     | Centralization          | The concentration (versus evenness) of centrality among the nodes.                                                                                       | Freeman (1979)                                                                                 |
| General        | W     | Graph diameter          | The longest path between any two nodes in a graph.                                                                                                       | Barabási et al. (2000); Urban and Keitt (2001)                                                 |
| General        | W     | Modularity              | Degree to which edges are distributed within rather than between distinct sets of nodes.                                                                 | Newman (2010)                                                                                  |
| General        | G     | Motifs                  | Small sets of nodes with similar distributions of edges.                                                                                                 | Milo et al. (2002)                                                                             |
| General        | W     | Link density            | Average number of edges per node.                                                                                                                        | Martinez (1992)                                                                                |
| Community      | N     | Temperature             | Measures the nestedness of a bipartite network.                                                                                                          | Ulrich and Gotelli (2007)                                                                      |
| Community      | W     | Co-occurrence           | Degree of overlapping spatial or temporal distributions of species relative to a null model.                                                             | Gotelli (2000)                                                                                 |
| Community      | N     | Indicator Species       | The degree to which the abundance of a taxonomic group responds to an environmental gradient.                                                            |                                                                                                |
| Community      | W     | Nestedness              | The degree to which interactions can be arranged into subsets of the larger community                                                                    |                                                                                                |
| Community      | W     | Evenness                | Deviation of the distribution of observed abundances relative to an even distribution among taxonomic groups in a community                              |                                                                                                |
| Community      | W     | Diversity               | Distribution of abundances among taxonomic groups in an observed community                                                                               |                                                                                                |
| Community      | W     | Richness                | The number of taxonomic groups in a community                                                                                                            |                                                                                                |
| Community      | W     | Stability               | The change in the abundances of taxonomic groups across a set of observations                                                                            |                                                                                                |
| Food-Web       | N     | Removal Importance      | The degree to which removal of a compartment or species produces subsequent removals in the ecosystem.                                                   | Borrvall et al. (2000); Dunne et al. (2002); Eklöf and Ebenman (2006); Solé and Montoya (2001) |
| General        | N     | Connectance             | Proportion of realized out of possible edges                                                                                                             | Pimm (1982); Vermaat et al. (2009)                                                             |
| Food-Web       | G     | Food-chain length       | The number of feeding relationships among a set of compartments in a food-web.                                                                           | Post et al. (2000); Ulanowicz et al. (2014)                                                    |
| Ecosystem      | W     | Finn cycling index      | Degree to which matter or energy passes through the same set of compartments.                                                                            | Finn (1980)                                                                                    |
| Ecosystem      | G     | Environ                 | The sub-network of the probability of movement of energy or matter among compartments generated by a single unit of input (output) into a selected node. | Patten (1978); Patten and Auble (1981)                                                         |
| Ecosystem      | N     | Throughflow             | Amount of energy or matter passing into or out of a node                                                                                                 | Finn (1976)                                                                                    |
| Ecosystem      | N     | Throughflow Centrality  | The proportion of energy or matter that passes through a given compartment in an ecosystem.                                                              | Borrett (2013)                                                                                 |
| General        | G     | Chain Length            | Number of edges between two nodes in a group                                                                                                             |                                                                                                |
| Food-Web       | G     | Average Path Length     | The average number of times a unit of matter or energy travels from one compartment to another before exiting the ecosystem                              | Finn (1976)                                                                                    |
| Ecosystem      | W     | Pathway Proliferation   | Rate of increase in the number of edges between nodes with increasing path length                                                                        | Borrett et al. (2007)                                                                          |
| Ecosystem      | W     | Ascendency              | Measures the average similarity in matter or energy flows among compartments in an ecosystem.                                                            | Ulanowicz (1986)                                                                               |
| Food-Web       | N     | Trophic Level           | Ordinal classification of a compartment or taxonomic group based on the relative position in the ecosystem.                                              | Allesina and Pascual (2009); Fath (2004); Williams et al. (2002)                               |

Table 1: Ecological network metric summary and classification. Level indicates the hierarchy of the metric (W = Whole network, G = Group or sub-network, N = Node). The Sub-disciplines include 'General' network theory, 'Community' ecology, 'Food-web' and 'Ecosystem' ecology. Also available at <https://figshare.com/s/1bf1a7e0a6ee3ac97a4b>.



967 **Figures**

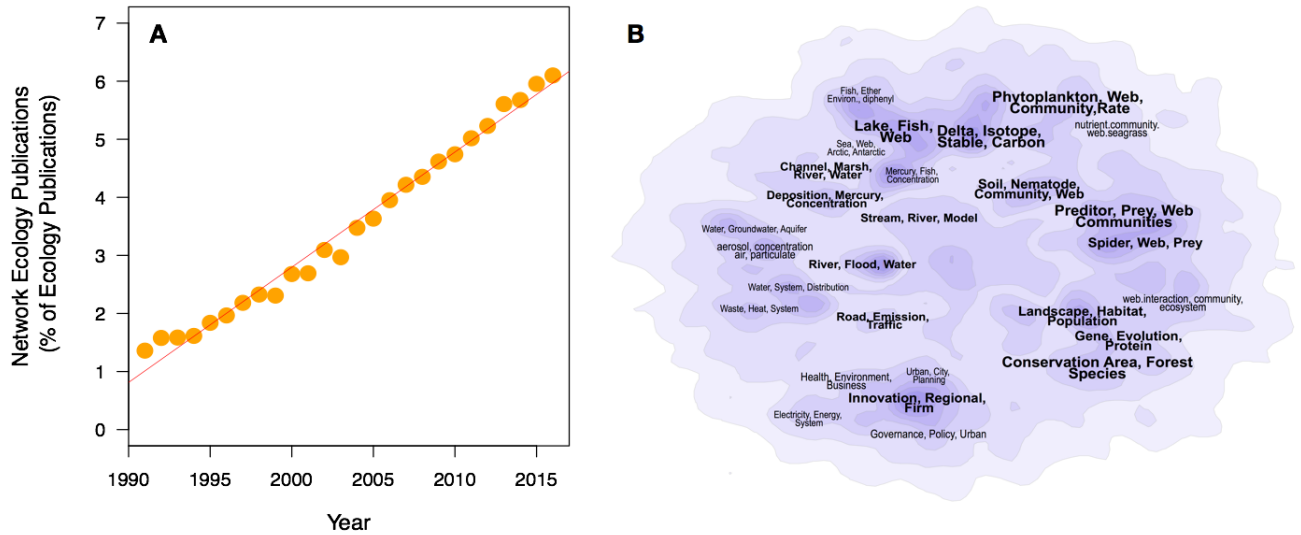

Figure 1: Although systems thinking has been a part of ecology since at least the work of Darwin, network ecology has grown rapidly since the turn of the last century but has been developing in isolated sub-fields. (A) Plot showing the increase in “network ecology” keywords in the literature from 1991 to current (updated using search developed by Borrett et al. (2014)). (B) Contour plot of common topics in network ecology with peaks indicating clusters of related topics. The regions are labeled with the most common terms found in the clusters. From Borrett et al. (2014), reproduced with permission.

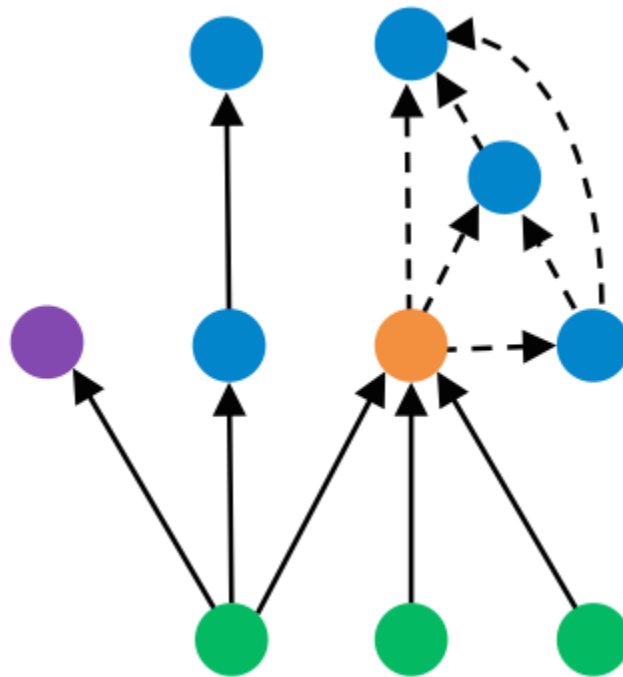

Figure 2: Hypothetical unweighted, directed network showing examples of the four classes of network metrics. *Node Level*: the purple node exhibits low centrality while the orange node exhibits high centrality. *Group or Sub-Network Level*: the blue nodes connected with dashed edges shows a module. *Global or Whole Network Level*: using the edges of all nodes we can measure the connectance of the entire network ( $c = \text{edges}/\text{nodes}^2 = 0.12$ ).
